# Supplementary material for: PERK–KIPK–KCBP signalling negatively regulates root growth in Arabidopsis thaliana
Source: PubMed Central journal article supplement (PMC4265151; doi:10.1093/jxb/eru390), 2014-09-26
Supplement: supp_eru390_jexbot127159_file001.pdf [file supp_eru390_jexbot127159_file001.pdf]

## Supplementary Data

Humphrey T, Haasen K, Aldea-Brydges MG, Sun H, Zayed Y, Indriolo E, Goring DR  
*PERK - KIPK - KCBP signalling negatively regulates root growth in Arabidopsis thaliana.*

```

KIPK1 MGSFAGACEIVEEKDDEVRLPKHSGRYGKSVMGSSSKDLVER  KQREYHGSL EYDIDMLFQSSISVKPSTTRLMSSSFHHHETSASA 85
KIPK2 -E-----S----- A---A--S--CM-PL--- --MEQ-PALKSG-Q--M-----Q-----TI---PR-V-G-----L----- 85

KIPK1 GPSRRTTSPSKRIASMKKP  GTPQSPRFVGLSDSVSLKQALRDRCI SKASEMAAQKRLSKSAAASPRVSEADRIKSLYNQVSNEST 169
KIPK2 -T--S---N KGA---FPM---R--- --P---I-----L-----S-----T---R--L---A 170

KIPK1 SSSRGLVPVDKGGKSLVEIPLMPVNDKPSSSKSVQPQFE  DPSNPISEPSQAGTSFGLQG  VGNQTREIKLLHRSNKP 245
KIPK2 GKPG L----- -S-T--V-I---Q-----YDVLETE--F-----EILLHVL-NGSGIKT--YGML-TVSC-CK---S 254

KIPK1 GSCLSSGSDYEIELDENVA SPSSTHAFVEDDVIEIDKHVTS LPSHSSKKNVATELDKNISSSA VDSE  QKGKLLDDAPNSG 324
KIPK2 -----I---HT-- P-MVI--QLV-----C-GS--DTE---S-V---R-K--PTALSSGL-----NF-G-- 340

KIPK1 TENGKTVRKVTRMIPRPK QPKKKILLKKLKI GVV SATYPTKDDEEIVPSLDSSANQLLQQRCHCSLKSTSIDDNPPS  YTSSH 407
KIPK2 --KS-L-S---N---PR-----V-N-- -MV--VDT--EP-----K---AV---TENH---NTSH-TDK 424

KIPK1 NPKICTDSLSSVSN  KEAHQGS DENSSGSCNVSQSSEADIVIMKQDVSSSNNSGIGAMVEKETENPT SSEKFESLSSKDSL G 489
KIPK2 -VS-EA-QE-LA-PR LIRIVKCNKEASKG--D--E--D-G-- VIV---E--P--Y--K-DAD-QIRA-----D-----N--- 510

KIPK1 DYSRSTSISEESNLRFSCGNKPHMSMDVRWEAIKHIKQVYSGSLGLRHFNLLKKGCGDIGTVYLAELIGTNCLFAIKVMDNEFLAR 576
KIPK2 --S--M-----V--V-L-----V----- 597

KIPK1 RKKSPRAQAEREILKMLDHPFLPTLYAQFTSDNLSCLVMEYCPGGDLHVL RQKQLGRFCFPEPAARFYVAEILLALEYLHMLGIIYRD 663
KIPK2 ---T-----A-----S---S---T-----V----- 684

KIPK1 LKPENILVREDGHIMLTDFDLSLRCAVNPTLVRSNSPPGKDPARISGPYNTSNCIQPFCITEPSCQVSCFSPRLSSNQOGRKPKRG 750
KIPK2 -----L--T--E---M---S-----L-- ---R-P-----L-T-ARNQ--RKP 770

KIPK1 DHLSKTQQHLSRSLPQLVAEPTEARSNSFVGTHEYLAPEI IKGEGHGAAVDWWTFGVLLYELLYGKTPFKGYNNDETLANVVLQNLK 837
KIPK2 KRPDLLT-QF -----D-E---S---Y--- 856

KIPK1 FPDSPLVSFQAKDLIRGLLVKEPENRLGSEKGSVEIKRHPFF EGLNWLIRCAIPPELPDFYEYGGGPEAAADSPGGSNNRYLECKA 924
KIPK2 -----E--R---D--S-----AA-----I-DN- ATE-T--E- ----- 939

KIPK1 IGDHLEFELF 934
KIPK2 ----- 949

```

**Fig. S1.** Amino acid sequence alignment of KIPK1 and KIPK2.

Sequences were aligned using ClustalW2 (<http://www.ebi.ac.uk/Tools/msa/clustalw2/>).

Dashes are identical amino acids and spaces are gaps in the alignment.

The smallest yeast two-hybrid library clone identified for KIPK2 is double underlined: \_\_\_\_\_

The following conserved regions are highlighted in the alignment:

**Serines** - in conserved N-terminal region

**Nuclear localization signal** - predicted by NLStradamus (Nguyen Ba et al., 2009)

**Nuclear export signal** - predicted by NetNES (la Cour et al., 2004)

**Serine/threonine protein kinase catalytic domain** - predicted by SMART (Schultz et al., 1998)

**S** or **T** - phosphorylated serine or threonine in KIPK2 - from the PhosPhAt database (Heazlewood et al., 2008)

**FELF** - C-terminal PDK1-Interacting Fragment (PIF)-like domain (Zegzouti et al., 2006)

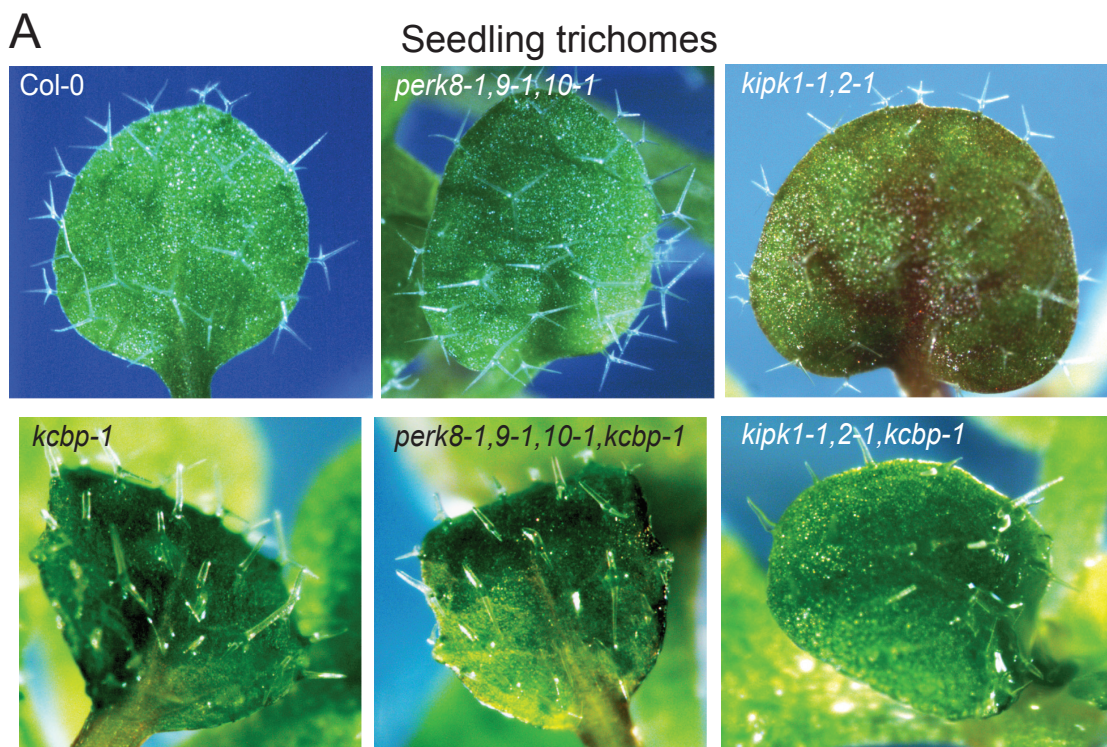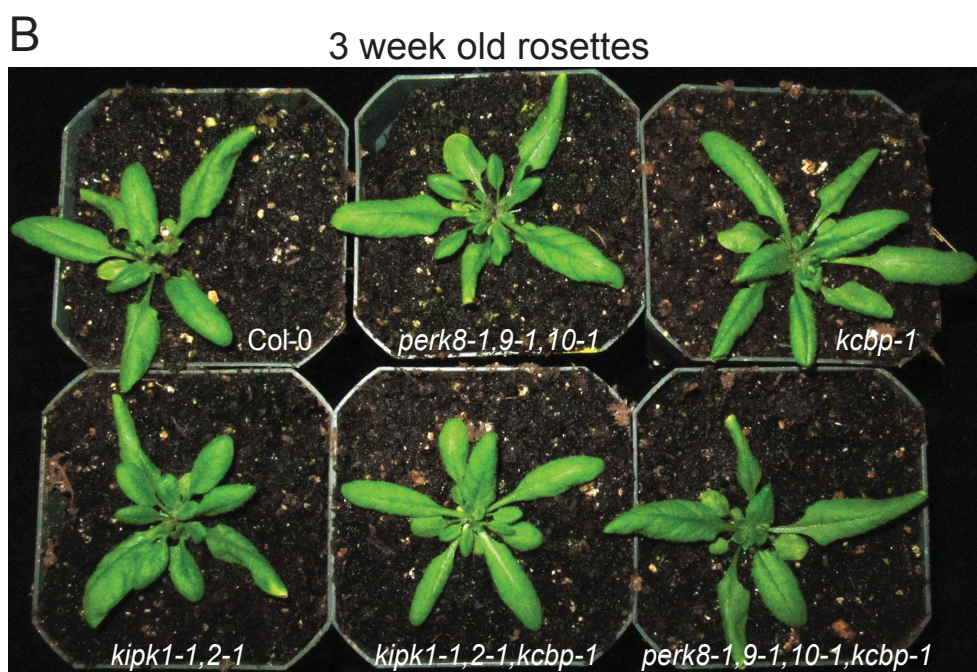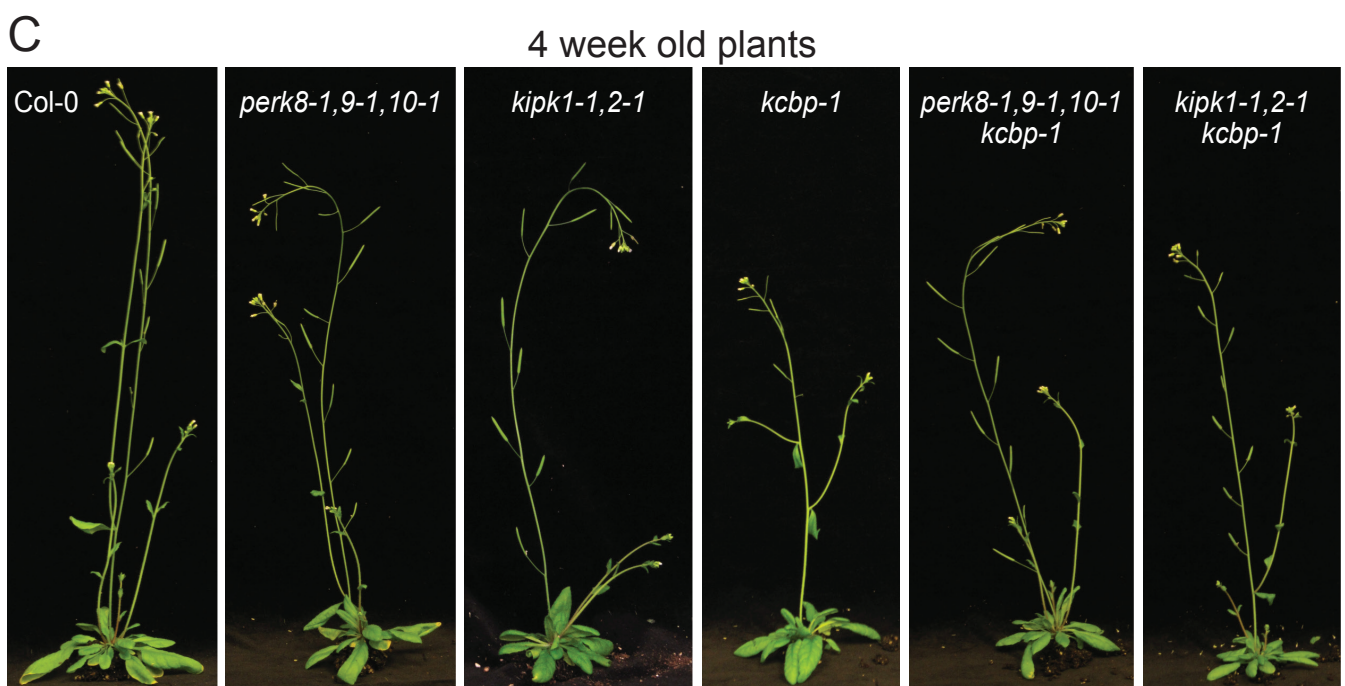

**Fig. S2.** Phenotypes of *perk*, *kipk* and *kcbp* mutant plants.

(A) Images of trichomes from seedlings at the 4- 6 leaf stage (grown on ½ MS plates).

(B) Images of rosettes from three-week old plants.

(C) Images of bolting four-week old plants.

Plants in both (B) and (C) were grown on soil in a 16 hour light/8 hour dark photoperiod at 22°C

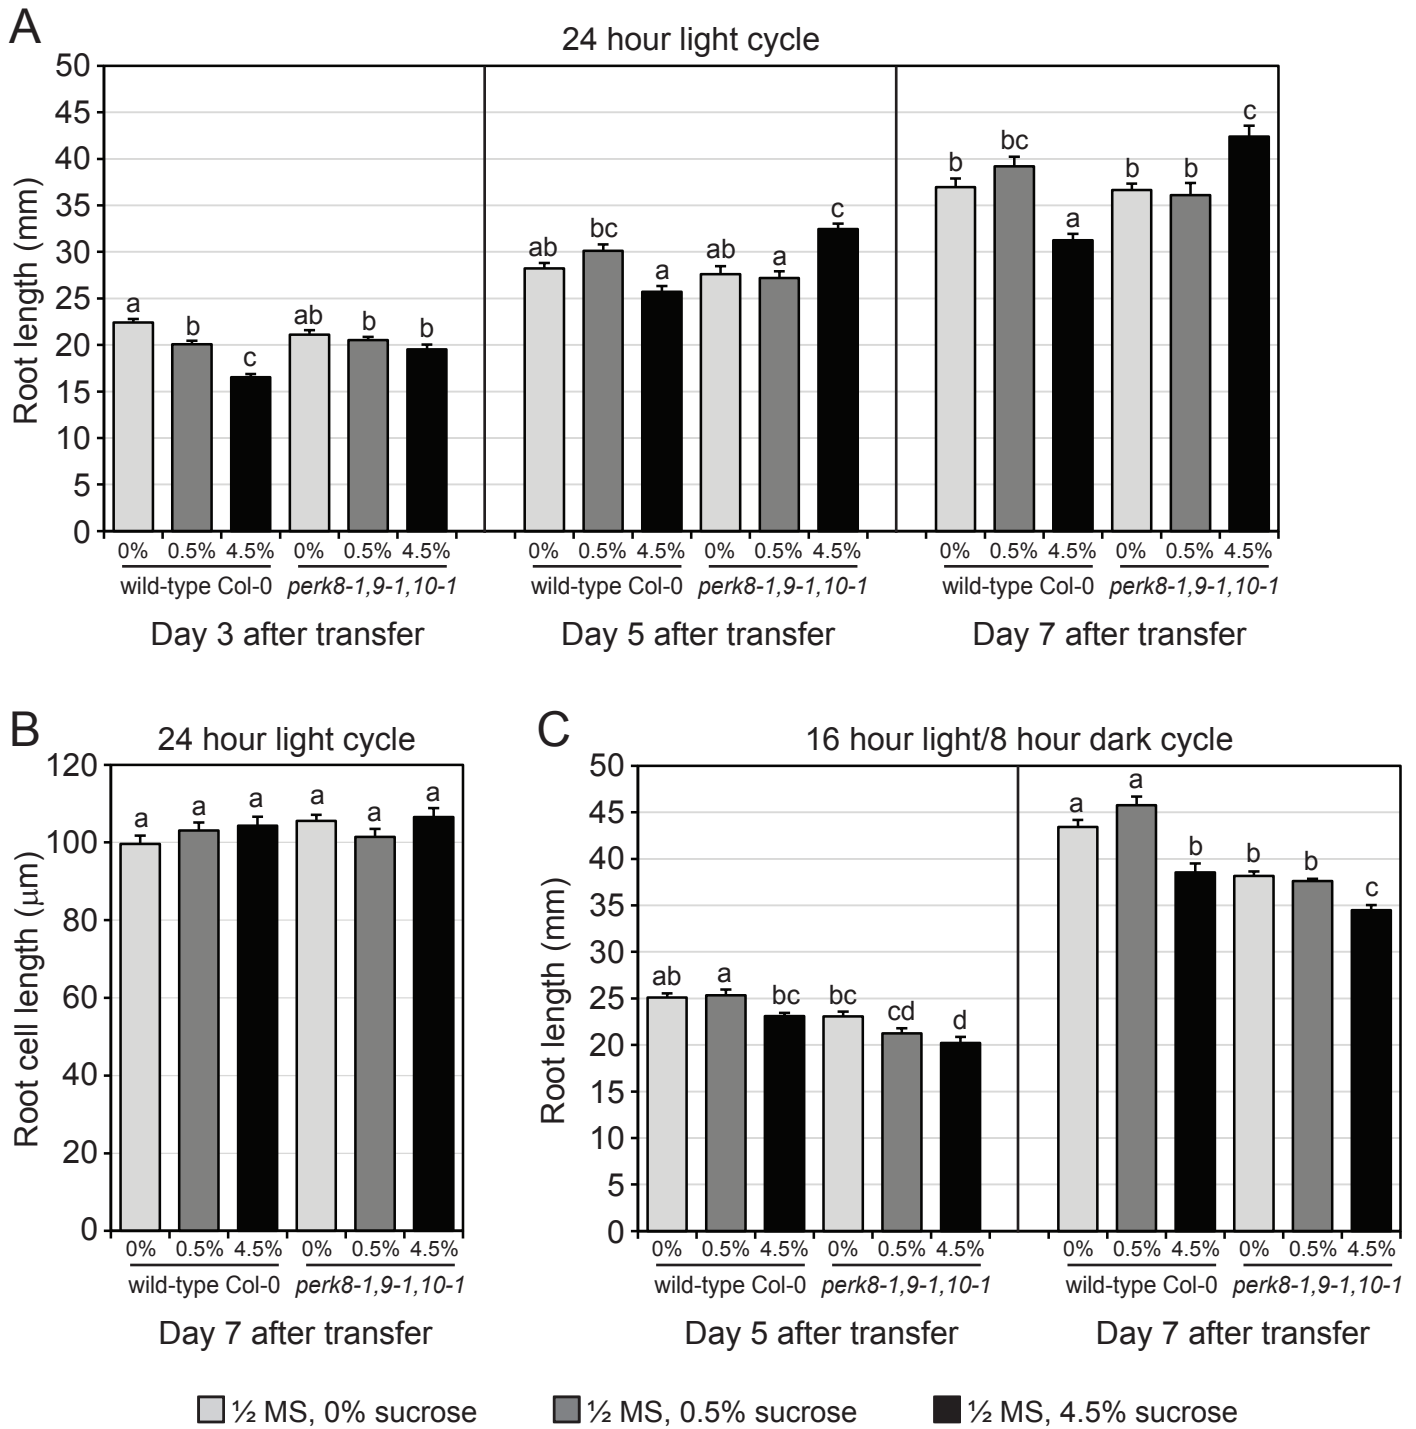

**Fig. S3.** Root growth of wild-type Col-0 and *perk8-1,9-1,10-1* triple mutant seedlings under different conditions.

**(A)** Graph showing root lengths at days 3, 5 and 7 after transfer. Seedlings were grown vertically under a 24 hour photoperiod on ½ MS plates with or without sucrose as indicated.  $n \geq 25$ .

**(B)** Graph showing elongated root cell lengths at 7 days after transfer. Seedlings were grown vertically under a 24 hour photoperiod on ½ MS plates with or without sucrose as indicated.  $n = 50$ .

**(C)** Graph showing root lengths at days 5 and 7 after transfer. Seedlings were grown vertically under a 16 hour light/8 hour dark photoperiod on ½ MS plates with or without sucrose as indicated.  $n \geq 25$ . The different letters represent means that are significantly different at  $P < 0.05$  for each timepoint (one-way ANOVA with Tukey-HSD post-hoc tests). Error bars = SE.

Table S1. Primers for RT-PCR Analyses

| Gene   | Left Primer             | Right Primer             | Product Size Without Intron | Product Size With Intron |
|--------|-------------------------|--------------------------|-----------------------------|--------------------------|
| PERK8  | GTCATCCCCGCATTATTCAC    | GTCAAACACTTGGCTCTGTCCT   | 545                         | 814                      |
| PERK9  | TCTGTTCTAGACTGGGCAACAC  | CGCCTAGTCTCATTCCGTTAGT   | 595                         | 1007                     |
| PERK10 | TACCATAAGCAGGGTACATCACC | TCTACCTAGCTTGGGATCTGCTA  | 577                         | 1035                     |
| KIPK1  | GAGGAGATCTTCATGTCCTCAGA | GGTCCACCACCATACTCATAGAA  | 856                         | 934                      |
| KIPK2  | CGCTGGAGTACTTACACATGCTT | CAGTGTCTCCTCATTGTCATAACC | 530                         | No Intron                |
| KCBP   | TGATCTTCAAACCCAGTCTGC   | ATCCACCAAGTCTTCTTCCTCA   | 445                         | 862                      |
| ACTIN7 | GGTGAGGATATTCAGCCACTT   | TGTGAGATCCCGACCCGCAAGATC | 555                         | 735                      |

**Table S2.** Root lengths for the *perk*, *kipk* and *kcbp* mutants under different conditions.

| <b>Dataset #1.</b> 24 hr light, Day 7 root lengths (mm), Mean $\pm$ SE |                              |                                |                                |
|------------------------------------------------------------------------|------------------------------|--------------------------------|--------------------------------|
|                                                                        | $\frac{1}{2}$ MS, 0% sucrose | $\frac{1}{2}$ MS, 0.5% sucrose | $\frac{1}{2}$ MS, 4.5% sucrose |
| wild-type Col-0                                                        | 36.80 $\pm$ 0.83             | 39.76 $\pm$ 0.61               | 34.94 $\pm$ 0.55               |
| <i>perk8-1,9-1,10-1</i>                                                | 35.96 $\pm$ 0.74             | 34.80 $\pm$ 0.60               | 40.34 $\pm$ 0.99               |
| <i>kipk1-1,2-1</i>                                                     | 36.27 $\pm$ 1.00             | 36.93 $\pm$ 0.71               | 39.46 $\pm$ 0.67               |
| <i>kcbp-1</i>                                                          | 36.77 $\pm$ 0.79             | 37.05 $\pm$ 0.78               | 40.12 $\pm$ 0.49               |
| <i>kipk1-1,2-1, kcbp-1</i>                                             | 36.63 $\pm$ 0.61             | 37.41 $\pm$ 0.64               | 40.46 $\pm$ 0.43               |
| <b>Dataset #2.</b> 24 hr light, Day 7 root lengths (mm), Mean $\pm$ SE |                              |                                |                                |
|                                                                        | 130 mM Mannitol              |                                |                                |
| wild-type Col-0                                                        | 26.40 $\pm$ 1.09             |                                |                                |
| <i>perk8-1,9-1,10-1</i>                                                | 23.90 $\pm$ 0.31             |                                |                                |
| <i>kipk1-1,2-1</i>                                                     | 26.25 $\pm$ 1.03             |                                |                                |
| <i>kcbp-1</i>                                                          | 26.28 $\pm$ 1.20             |                                |                                |
| <b>Dataset #3.</b> 24 hr light, Day 7 root lengths (mm), Mean $\pm$ SE |                              |                                |                                |
|                                                                        | $\frac{1}{2}$ MS, 0% sucrose | $\frac{1}{2}$ MS, 0.5% sucrose | $\frac{1}{2}$ MS, 4.5% sucrose |
| wild-type Col-0                                                        | 35.33 $\pm$ 0.43             | 37.04 $\pm$ 0.69               | 32.10 $\pm$ 0.48               |
| <i>perk8-1</i>                                                         | 34.23 $\pm$ 0.59             | 36.86 $\pm$ 0.60               | 32.07 $\pm$ 0.46               |
| <i>perk9-1</i>                                                         | 29.70 $\pm$ 0.36             | 30.27 $\pm$ 0.40               | 26.35 $\pm$ 0.37               |
| <i>perk10-1</i>                                                        | 30.90 $\pm$ 0.42             | 32.07 $\pm$ 0.34               | 28.42 $\pm$ 0.51               |
| <b>Dataset #4.</b> 24 hr light, Day 7 root lengths (mm), Mean $\pm$ SE |                              |                                |                                |
|                                                                        | $\frac{1}{2}$ MS, 0% sucrose | $\frac{1}{2}$ MS, 0.5% sucrose | $\frac{1}{2}$ MS, 4.5% sucrose |
| wild-type Col-0                                                        | 37.00 $\pm$ 0.63             | 38.99 $\pm$ 0.64               | 34.42 $\pm$ 0.64               |
| <i>perk8-1,9-1</i>                                                     | 36.21 $\pm$ 0.77             | 37.01 $\pm$ 0.63               | 38.12 $\pm$ 0.70               |
| <i>perk8-1,10-1</i>                                                    | 36.95 $\pm$ 0.68             | 36.25 $\pm$ 0.52               | 37.22 $\pm$ 0.68               |
| <i>perk9-1,10-1</i>                                                    | 36.56 $\pm$ 0.61             | 35.27 $\pm$ 0.73               | 37.82 $\pm$ 0.67               |
| <b>Dataset #5.</b> 24 hr light, Day 7 root lengths (mm), Mean $\pm$ SE |                              |                                |                                |
|                                                                        | $\frac{1}{2}$ MS, 0% sucrose | $\frac{1}{2}$ MS, 0.5% sucrose | $\frac{1}{2}$ MS, 4.5% sucrose |
| wild-type Col-0                                                        | 34.69 $\pm$ 0.44             | 35.20 $\pm$ 0.59               | 31.02 $\pm$ 0.51               |
| <i>kipk1-1</i>                                                         | 33.50 $\pm$ 0.57             | 32.00 $\pm$ 0.56               | 35.09 $\pm$ 0.81               |
| <i>kipk2-1</i>                                                         | 32.53 $\pm$ 0.74             | 30.65 $\pm$ 0.63               | 33.26 $\pm$ 0.69               |
| <i>perk8-1,9-1,10-1,kcbp-1</i>                                         | 32.35 $\pm$ 0.64             | 33.25 $\pm$ 0.46               | 38.18 $\pm$ 0.81               |

The data in this table was used to calculate the ratios shown in Fig. 4.

**Table S3. DEX::PERK10 seedling phenotypes in Col-0 and the *perk*, *kipk* and *kcbp* mutants. Day 5 of the germination assay (% in each category)**

| Primary transformants | Col-0/DEX only |             |                            |                                                 | Col-0/DEX::PERK10 |             |                            |                                                 | <i>perk8-1,9-1,10-1</i> /DEX::PERK10 |             |                            |                                                 | <i>kipk1-2,2-1</i> /DEX::PERK10 |             |                            |                                                 | <i>kcbp-1</i> /DEX::PERK10 |             |                            |                                                 |
|-----------------------|----------------|-------------|----------------------------|-------------------------------------------------|-------------------|-------------|----------------------------|-------------------------------------------------|--------------------------------------|-------------|----------------------------|-------------------------------------------------|---------------------------------|-------------|----------------------------|-------------------------------------------------|----------------------------|-------------|----------------------------|-------------------------------------------------|
|                       | N*             | Wild-type** | Brown pigment in hypocotyl | Brown pigment in root tip; Rapid 1° root arrest | N*                | Wild-type** | Brown pigment in hypocotyl | Brown pigment in root tip; Rapid 1° root arrest | N*                                   | Wild-type** | Brown pigment in hypocotyl | Brown pigment in root tip; Rapid 1° root arrest | N*                              | Wild-type** | Brown pigment in hypocotyl | Brown pigment in root tip; Rapid 1° root arrest | N*                         | Wild-type** | Brown pigment in hypocotyl | Brown pigment in root tip; Rapid 1° root arrest |
| 1                     | 96             | 100         | 0                          | 0                                               | 238               | 61          | 8                          | 31                                              | 291                                  | 73          | 27                         | 0                                               | 87                              | 17          | 83                         | 0                                               | 286                        | 43          | 57                         | 0                                               |
| 2                     | 105            | 100         | 0                          | 0                                               | 271               | 86          | 0                          | 14                                              | 216                                  | 37          | 63                         | 0                                               | 114                             | 23          | 77                         | 4                                               | 323                        | 30          | 70                         | 0                                               |
| 3                     | 91             | 100         | 0                          | 0                                               | 420               | 100         | 0                          | 0                                               | 220                                  | 70          | 30                         | 0                                               | 57                              | 82          | 18                         | 2                                               | 249                        | 56          | 41                         | 3                                               |
| 4                     | 51             | 100         | 0                          | 0                                               | 311               | 67          | 0                          | 33                                              | 242                                  | 68          | 32                         | 0                                               | 78                              | 21          | 79                         | 0                                               | 367                        | 43          | 57                         | 0                                               |
| 5                     | 101            | 100         | 0                          | 0                                               | 206               | 49.5        | 0.5                        | 50                                              | 350                                  | 100         | 0                          | 0                                               | 125                             | 17          | 83                         | 0                                               | 136                        | 33          | 67                         | 0                                               |
| 6                     | 122            | 100         | 0                          | 0                                               | 325               | 98.5        | 0.6                        | 0.9                                             | 357                                  | 89          | 11                         | 0                                               | 104                             | 30          | 70                         | 0                                               | 397                        | 75          | 25                         | 0                                               |
| 7                     | 115            | 100         | 0                          | 0                                               | 347               | 97          | 0                          | 3                                               | 355                                  | 48          | 52                         | 0                                               | 60                              | 20          | 80                         | 0                                               | 237                        | 87          | 13                         | 0                                               |
| 8                     | 118            | 100         | 0                          | 0                                               | 379               | 93          | 7                          | 0                                               | 314                                  | 29          | 71                         | 0                                               | 131                             | 23          | 77                         | 0                                               | 193                        | 12          | 88                         | 0                                               |
| 9                     | 120            | 100         | 0                          | 0                                               | 323               | 66          | 0                          | 34                                              | 335                                  | 84          | 16                         | 0                                               | 162                             | 33          | 67                         | 2                                               | 308                        | 28          | 72                         | 0                                               |
| 10                    | 105            | 100         | 0                          | 0                                               | 320               | 43          | 8                          | 49                                              | 361                                  | 97          | 3                          | 0                                               | 116                             | 48          | 52                         | 0                                               | 306                        | 66          | 34                         | 0                                               |
| 11                    | 109            | 100         | 0                          | 0                                               | 257               | 81          | 14                         | 5                                               | 338                                  | 89          | 11                         | 0                                               | 112                             | 68          | 32                         | 0                                               | 329                        | 86          | 14                         | 0                                               |
| 12                    | 111            | 100         | 0                          | 0                                               | 347               | 64          | 30                         | 6                                               | 351                                  | 99.7        | 0.3                        | 0                                               | 95                              | 18          | 82                         | 1                                               | 356                        | 22          | 78                         | 0                                               |
| 13                    | 103            | 100         | 0                          | 0                                               | 402               | 46          | 33                         | 21                                              | 328                                  | 79          | 21                         | 0                                               | 93                              | 36          | 53                         | 24                                              | 141                        | 56          | 44                         | 0                                               |
| 14                    | 108            | 100         | 0                          | 0                                               | 294               | 95.3        | 4                          | 0.7                                             | 339                                  | 79          | 21                         | 0                                               | 113                             | 67          | 33                         | 0                                               | 362                        | 9           | 91                         | 0                                               |
| 15                    | 121            | 100         | 0                          | 0                                               | 208               | 38          | 29                         | 33                                              | 324                                  | 29          | 71                         | 0                                               | 86                              | 69          | 31                         | 0                                               | 108                        | 64          | 36                         | 0                                               |
| 16                    | 119            | 100         | 0                          | 0                                               | 159               | 23          | 35                         | 42                                              | 345                                  | 80          | 20                         | 0                                               | 164                             | 44          | 56                         | 0                                               | 219                        | 51          | 49                         | 0                                               |
| 17                    | 120            | 100         | 0                          | 0                                               | 220               | 56.1        | 0.9                        | 43                                              | 342                                  | 25          | 75                         | 0                                               | 101                             | 51          | 44                         | 16                                              | 324                        | 65          | 35                         | 0                                               |
| 18                    | 99             | 100         | 0                          | 0                                               | 305               | 58          | 10                         | 32                                              | 321                                  | 67          | 33                         | 0                                               | 120                             | 49          | 51                         | 0                                               | 286                        | 35          | 65                         | 0                                               |
| 19                    | 104            | 100         | 0                          | 0                                               | 176               | 40          | 0                          | 60                                              | 413                                  | 24          | 76                         | 0                                               | 128                             | 37          | 63                         | 0                                               | 274                        | 34          | 66                         | 0                                               |
| 20                    | 98             | 100         | 0                          | 0                                               | 168               | 36.9        | 0.6                        | 62.5                                            | 465                                  | 99          | 1                          | 0                                               | 156                             | 33          | 67                         | 0                                               | 374                        | 62          | 38                         | 0                                               |
| <b>Total:</b>         | 2116           |             |                            |                                                 | 5676              |             |                            |                                                 | 6607                                 |             |                            |                                                 | 2202                            |             |                            |                                                 | 5575                       |             |                            |                                                 |
| <b>Mean:</b>          |                | 100         | 0                          | 0                                               |                   | 64.965      | 9.03                       | 26.005                                          |                                      | 68.285      | 31.715                     | 0                                               |                                 | 39.3        | 59.9                       | 2.45                                            |                            | 47.85       | 52                         | 0.15                                            |
| <b>SE:</b>            |                | 0           | 0                          | 0                                               |                   | 5.359052    | 2.769648                   | 4.73574                                         |                                      | 5.976107    | 5.976107                   | 0                                               |                                 | 4.440898    | 4.493211                   | 1.392603                                        |                            | 5.066025    | 5.080924                   | 0.15                                            |
| <b>T-test:</b>        |                |             |                            |                                                 |                   |             |                            |                                                 |                                      | 0.68149     | 0.001411                   | 2.84E-06                                        |                                 | 0.000705    | 9.43E-12                   | 2.7E-05                                         |                            | 0.025761    | 6.58E-09                   | 3.16E-06                                        |

\*N = the number of germinated seeds screened from each independent primary transformant.

\*\*Up to 25% of the seeds may be untransformed wild-type (depending on the # of integrated transgenes) since the seeds were from 1° transformants and no transgene selection was applied.
